# Supplementary material
Source: publisher figshare collection journal article supplement (https://tandf.figshare.com/articles/dataset/_/25975210)
Supplement: Supplementary file 1 [file 1]

Table S1.

*Demographic and Clinical Variables Available across Contributing Datasets*

*Note.* IP = identified patient; FM = family member; PTSD = posttraumatic stress disorder; SORTS = Significant Others’ Responses to Trauma Scale.

|  | Dataset 1 | Dataset 2 | Dataset 3 | Dataset 4 | Dataset 5 | Dataset 6 | Dataset 7 | Dataset 8 | Dataset 9 | Dataset 10 |
| --- | --- | --- | --- | --- | --- | --- | --- | --- | --- | --- |
| IP age | X | X |  | X | X | X | X | X | X | X |
| IP gender | X |  |  | X | X | X | X | X | X | X |
| IP race | X | X | X | X | X | X | X | X | X | X |
| IP ethnicity | X | X | X | X | X | X | X | X | X | X |
| IP education | X |  | X |  | X | X | X | X | X | X |
| IP PTSD diagnostic status | X |  |  |  | X |  |  |  | X | X |
| IP PTSD symptom severity | X | X | X | X | X | X | X | X | X | X |
| IP veteran/military status | X | X | X | X | X | X | X |  | X | X |
| FM age | X | X | X |  |  | X |  | X | X | X |
| FM gender | X |  | X | X |  | X | X | X | X | X |
| FM race | X | X | X |  |  | X |  | X | X | X |
| FM ethnicity | X | X | X |  |  | X |  | X | X | X |
| FM education | X |  | X |  |  | X |  | X | X | X |
| FM PTSD diagnostic status | X |  |  | X | X |  |  |  |  |  |
| FM PTSD symptom severity |  |  |  |  |  |  |  |  | X |  |
| FM veteran/military status |  | X | X |  |  |  |  |  | X |  |
| FM relationship to IP | X | X | X | X | X | X |  | X | X | X |
| FM SORTS | X | X | X | X | X | X | X | X | X | X |

Table S2.

*Fit Statistics Across EFA Models*

|  | χ2 | df | *p* | CFI | TLI | RMSEA 90% CI | RMSR |
| --- | --- | --- | --- | --- | --- | --- | --- |
| Summed model, 1 factor | 468.18 | 77 | <.001 | 0.830 | 0.799 | 0.125 – 0.149 | 0.072 |
| Summed model, 2 factors | 194.76 | 64 | <.001 | 0.943 | 0.919 | 0.073 – 0.101 | 0.037 |
| Frequency model, 1 factor | 440.58 | 77 | <.001 | 0.930 | 0.918 | 0.120 – 0.144 | 0.094 |
| Frequency model, 2 factors | 133.81 | 64 | <.001 | 0.987 | 0.981 | 0.048 – 0.078 | 0.042 |
| Distress model, 1 factor | 375.96 | 77 | <.001 | 0.942 | 0.931 | 0.108 – 0.132 | 0.089 |
| Distress model, 2 factors | 107.73 | 64 | <.001 | 0.991 | 0.988 | 0.033 – 0.066 | 0.041 |

*Note.* Summed model uses a sum of the frequency and distress items for a given type of accommodation (14 indicators with a possible score of 0-8). Frequency model only includes scores on the frequency items (14 indicators with a possible score of 0-4). Distress model only includes scores on the distress items (14 indicators with a possible score of 0-4). EFA = exploratory factor analysis; CFI = Bentler comparative fit index; TLI = Tucker-Lewis index; RMSEA 90% CI = 90% confidence interval of the root mean square error of approximation; RMSR = standardized root mean square residual.

Table S3.

*Factor Loadings for Two-Factor EFA Models Using Summed Frequency/Distress Items, Only Frequency Items, and Only Distress Items*

|  | Summed model | | Frequency model | | Distress model | |
| --- | --- | --- | --- | --- | --- | --- |
|  | Factor 1 | Factor 2 | Factor 1 | Factor 2 | Factor 1 | Factor 2 |
| 1. Avoid [Name] because of his/her irritable or angry mood? | **0.823** | 0.014 | **0.808** | 0.114 | **0.781** | 0.058 |
| 2. Avoid being physically close with [Name] because of his/her discomfort? | 0.285* | **0.345** | **0.411** | 0.308* | **0.396** | 0.313* |
| 3. Cancel or rearrange plans or social activities because [Name] did not want to do them? | 0.106 | **0.685** | 0.000 | **0.835** | 0.088 | **0.787** |
| 4. Avoid doing things, going places, or seeing people with [Name] that make him/her anxious or uncomfortable? | -0.042 | **0.803** | -0.160 | **0.963** | -0.048 | **0.879** |
| 5. “Bite your tongue” or hold back from trying to discuss any relationship issues with [Name]? | **0.899** | -0.051 | **0.941** | -0.051 | **0.927** | -0.049 |
| 6. Take over a task or chore for [Name] that he/she is uncomfortable doing because of his/her traumatic event? | 0.047 | **0.457** | -0.063 | **0.748** | 0.021 | **0.633** |
| 7. Help [Name] with a task because he/she was having trouble concentrating? | 0.136 | **0.505** | 0.014 | **0.662** | 0.137 | **0.590** |
| 8. Make excuses to others for [Name]’s behavior or try to manage his/her relationships with other people? | **0.665** | 0.175* | **0.517** | 0.348* | **0.691** | 0.213* |
| 9. “Tiptoe” around [Name] so as not to anger him/her? | **0.908** | -0.008 | **0.901** | 0.038 | **0.948** | -0.002 |
| 10. Avoid discussing events related to [Name]’s traumatic event(s) in front of him/her to avoid his/her becoming upset? | 0.321* | **0.374** | 0.232* | **0.504** | **0.484** | 0.322* |
| 11. Not share your own feelings or concerns with [Name] due to concerns that he/she would become upset? | **0.788** | 0.033 | **0.896** | -0.020 | **0.794** | 0.065 |
| 12. Change your routine due to [Name]’s difficulties? | -0.001 | **0.806** | 0.052 | **0.812** | 0.006 | **0.883** |
| 13. How much have you modified your leisure activities due to [Name]’s difficulties? | -0.001 | **0.813** | 0.061 | **0.793** | -0.013 | **0.894** |
| 14. Give up control to [Name] because of his/her desire to be in charge? | **0.642** | -0.001 | **0.581** | 0.033 | **0.740** | -0.023 |

*Note.* Summed model uses a sum of the frequency and distress items for a given type of accommodation (14 indicators with a possible score of 0-8). Frequency model only includes scores on the frequency items (14 indicators with a possible score of 0-4). Distress model only includes scores on the distress items (14 indicators with a possible score of 0-4). Factor 1 represents “anger-related accommodation”; Factor 2 represents “anxiety-related accommodation.” Bold text indicates primary loading, * = significant cross-loading. SORTS = Significant Others’ Responses to Trauma Scale.

Table S4.

*Correlations Between Latent Factors Across the Two-Factor EFA Models*

|  | *r* |
| --- | --- |
| Summed model | .698 |
| Frequency model | .680 |
| Distress model | .689 |

*Note.* Summed model uses a sum of the frequency and distress items for a given type of accommodation (14 indicators with a possible score of 0-8). Frequency model only includes scores on the frequency items (14 indicators with a possible score of 0-4). Distress model only includes scores on the distress items (14 indicators with a possible score of 0-4).

Table S5.

*Parameter Estimates (and Standard Errors) of Item Discrimination and Difficulty by SORTS Item and Severity Score*

| Item | *a* | *b1* | *b2* | *b3* | *b4* |
| --- | --- | --- | --- | --- | --- |
| 1A – Avoid [Name] because of his/her irritable or angry mood? (Freq) | 1.964 (0.190) | -1.382 (0.176) | 0.616 (0.155) | 1.862 (0.190) | 4.056 (0.314) |
| 1B – Avoid [Name] because of his/her irritable or angry mood? (Dis) | 2.026 (0.195) | -0.898 (0.163) | 0.126 (0.156) | 1.254 (0.175) | 2.833 (0.232) |
| 2A – Avoid being physically close with [Name] because of his/her discomfort? (Freq) | 1.307 (0.133) | 0.225 (0.126) | 1.466 (0.154) | 2.177 (0.178) | 3.274 (0.245) |
| 2B – Avoid being physically close with [Name] because of his/her discomfort? (Dis) | 1.642 (0.169) | 0.365 (0.143) | 1.056 (0.154) | 1.720 (0.171) | 2.851 (0.218) |
| 3A – Cancel or rearrange plans or social activities because [Name] did not want to do them? (Freq) | 1.652 (0.179) | -0.280 (0.139) | 2.315 (0.200) | 3.644 (0.251) | 5.568 (0.465) |
| 3B – Cancel or rearrange plans or social activities because [Name] did not want to do them? (Dis) | 2.045 (0.213) | 0.213 (0.159) | 1.408 (0.179) | 2.521 (0.224) | 3.969 (0.311) |
| 4A – Avoid doing things, going places, or seeing people with [Name] that make him/her anxious or uncomfortable? (Freq) | 1.871 (0.200) | -0.347 (0.149) | 2.015 (0.191) | 2.927 (0.241) | 4.300 (0.325) |
| 4B – Avoid doing things, going places, or seeing people with [Name] that make him/her anxious or uncomfortable? (Dis) | 2.470 (0.276) | 0.460 (0.183) | 1.708 (0.213) | 3.041 (0.281) | 4.456 (0.394) |
| 5A – “Bite your tongue” or hold back from trying to discuss any relationship issues with [Name]? (Freq) | 2.773 (0.289 | -1.866 (0.235) | 0.414 (0.193) | 1.992 (0.245) | 3.930 (0.365) |
| 5B – “Bite your tongue” or hold back from trying to discuss any relationship issues with [Name]? (Dis) | 3.180 (0.314) | -1.550 (0.240) | -0.084 (0.207) | 1.627 (0.247) | 3.612 (0.336) |
| 6A – Take over a task or chore for [Name] that he/she is uncomfortable doing because of his/her traumatic event? (Freq) | 1.726 (0.189) | 0.580 (0.147) | 1.841 (0.179) | 2.663 (0.210) | 3.702 (0.262) |
| 6B – Take over a task or chore for [Name] that he/she is uncomfortable doing because of his/her traumatic event? (Dis) | 2.105 (0.260) | 1.574 (0.200) | 2.606 (0.228) | 3.773 (0.293) | 4.886 (0.415) |
| 7A – Help [Name] with a task because he/she was having trouble concentrating? (Freq) | 1.734 (0.178) | -0.986 (0.154) | 0.720 (0.148) | 1.808 (0.174) | 3.335 (0.251) |
| 7B – Help [Name] with a task because he/she was having trouble concentrating? (Dis) | 1.844 (0.227) | 1.105 (0.170) | 2.560 (0.219) | 3.523 (0.261) | 4.741 (0.342) |
| 8A – Make excuses to others for [Name]’s behavior or try to manage his/her relationships with other people? (Freq) | 1.898 (0.186) | -0.510 (0.153) | 1.721 (0.180) | 2.949 (0.227) | 3.787 (0.270) |
| 8B – Make excuses to others for [Name]’s behavior or try to manage his/her relationships with other people? (Dis) | 2.378 (0.230) | -0.053 (0.173) | 1.205 (0.186) | 2.618 (0.230) | 4.391 (0.334) |
| 9A – “Tiptoe” around [Name] so as not to anger him/her? (Freq) | 3.376 (0.393) | -1.223 (0.251) | 1.153 (0.240) | 2.751 (0.325) | 4.480 (0.456) |
| 9B – “Tiptoe” around [Name] so as not to anger him/her? (Dis) | 3.622 (0.427) | -0.946 (0.252) | 0.677 (0.235) | 2.023 (0.298) | 4.261 (0.458) |
| 10A – Avoid discussing events related to [Name]’s traumatic event(s) in front of him/her to avoid his/her becoming upset? (Freq) | 1.483 (0.159) | 0.092 (0.132) | 1.560 (0.159) | 2.272 (0.189) | 3.130 (0.235) |
| 10B – Avoid discussing events related to [Name]’s traumatic event(s) in front of him/her to avoid his/her becoming upset? (Dis) | 1.504 (0.186) | 1.151 (0.156) | 2.129 (0.181) | 3.063 (0.229) | 4.333 (0.316) |
| 11A – Not share your own feelings or concerns with [Name] due to concerns that he/she would become upset? (Freq) | 2.938 (0.288) | -1.756 (0.233) | 0.825 (0.209) | 2.507 (0.274) | 4.321 (0.378) |
| 11B – Not share your own feelings or concerns with [Name] due to concerns that he/she would become upset? (Dis) | 3.234 (0.329) | -1.109 (0.225) | 0.377 (0.218) | 1.950 (0.257) | 4.175 (0.387) |
| 12A – Change your routine due to [Name]’s difficulties? (Freq) | 3.210 (0.381) | -0.665 (0.218) | 2.092 (0.269) | 3.595 (0.385) | 5.660 (0.557) |
| 12B – Change your routine due to [Name]’s difficulties? (Dis) | 3.072 (0.347) | 0.356 (0.212) | 2.259 (0.277) | 3.736 (0.370) | 5.378 (0.498) |
| 13A – How much have you modified your leisure activities due to [Name]’s difficulties? (Freq) | 2.783 (0.272) | -1.121 (0.202) | 1.346 (0.207) | 3.217 (0.290) | 5.854 (0.495) |
| 13B – How much have you modified your leisure activities due to [Name]’s difficulties? (Dis) | 3.510 (0.384) | -0.222 (0.231) | 2.176 (0.289) | 3.773 (0.377) | 5.508 (0.517) |
| 14A – Give up control to [Name] because of his/her desire to be in charge? (Freq) | 1.402 (0.157) | -0.018 (0.140) | 1.364 (0.159) | 2.272 (0.192) | 3.193 (0.241) |
| 14B – Give up control to [Name] because of his/her desire to be in charge? (Dis) | 1.746 (0.200) | 0.542 (0.157) | 1.876 (0.191) | 2.729 (0.230) | 3.976 (0.301) |

*Note*. *a* = item discrimination; *b1* = item difficulty for the 1 – “1 or 2 times per month” or “somewhat” score; *b2* = item difficulty for the 2 - “1 or 2 times per week” or “moderately” score; *b3* = item difficulty for the 3 - “several times per week” or “significantly” score; *b4* = item difficulty for the 4 - “daily or almost every day” or “extremely” score; Freq = frequency; Dis = distress.
